# Supplementary material for: Evolutionary Trajectory for the Emergence of Novel Coronavirus SARS-CoV-2
Source: PubMed Central journal article supplement (PMC7157669; doi:10.3390/pathogens9030240), 2020-03-23

Article

# Evolutionary Trajectory for the Emergence of Novel Coronavirus SARS-CoV-2

Saif ur Rehman <sup>1</sup>, Laiba Shafique <sup>1</sup>, Awais Ihsan <sup>2,3,\*</sup> and Qingyou Liu <sup>1,\*</sup>

<sup>1</sup> State Key Laboratory for Conservation and Utilization of Subtropical Agro-bioresources of Guangxi University, Nanning 530005, China; Saifurrehman4337904@gmail.com (S.u.R.), laibazooologist@gmail.com (L.A.)

<sup>2</sup> Department of Biosciences, COMSATS University Islamabad, Sahiwal Campus 57000, Pakistan

<sup>3</sup> College of Pharmacy, South Central University for Nationalities, Wuhan 430074, China

\* Correspondence: awais.dr@gmail.com (A.I.) and qyliu-gene@gxu.edu.cn (Q.L.); Tel.: +8613878805296

Received: 3 March 2020; Accepted: 21 March 2020; Published: 23 March 2020

**Table S1.** Coronavirus and their NCBI accession numbers used for phylogenetic analysis.

| NCBI accession number | Strain                                    | Full Name                                            |
|-----------------------|-------------------------------------------|------------------------------------------------------|
| NC_038861.1           | TGEV Purdue                               | Transmissible gastroenteritis virus                  |
| DQ811787.1            | PRCV ISU-1                                | porcine respiratory coronavirus                      |
| DQ848678.1            | FCoV C1Je                                 | Feline coronavirus                                   |
| NC_005831.2           | HCoV-NL63                                 | Human Coronavirus NL63                               |
| NC_002645.1           | HCoV-229E                                 | Human coronavirus 229E                               |
| EU420139.1            | Mi-BatCoV AFCD77                          | Miniopterus bat coronavirus                          |
| EU420137.1            | Mi-BatCoV 1B AFCD307                      | Bat coronavirus 1B strain AFCD307                    |
| NC_010437.1           | Mi-BatCoV 1A AFCD62                       | Bat coronavirus 1A                                   |
| NC_018871.1           | Ro-BatCoV HKU10                           | Rousettus bat coronavirus HKU10                      |
| NC_022103.1           | BatCoV CDPHE15/USA/2006                   | BatCoV CDPHE15/USA/2006                              |
| NC_009657.1           | Sc BatCoV 512/2005                        | Scotophilus bat coronavirus                          |
| AF353511.1            | PEDV CV777                                | Porcine epidemic diarrhea virus strain CV777         |
| KU131570.1            | HCoV-OC43                                 | Human coronavirus OC43 strain                        |
| DQ011855.1            | PHEV VW572                                | Porcine hemagglutinating encephalomyelitis virus     |
| KT444582.1            | SARS-like_coronavirus_WIV16               |                                                      |
| MH940245.1            | HCoV-HKU1                                 | Human coronavirus HKU1                               |
| NC_001846.1           | MHV-A59                                   | Mouse hepatitis virus strain MHV-A59 C12             |
| KF367457.1            | Bat SARSr-CoV WIV1<br>Rhinolophus sinicus | Bat SARS-like coronavirus WIV1                       |
| DQ071615.1            | Bat SARSr-CoV Rp3                         | Bat SARS coronavirus Rp3                             |
| DQ022305.2            | Bat SARSr-CoV HKU3-1                      | Bat SARS coronavirus HKU3                            |
| DQ412043.1            | Bat SARSr-CoV Rm1<br>Rhinolophus macrotis | Bat SARS coronavirus Rm1                             |
| DQ412042.1            | Bat SARSr-CoV Rf1                         | Bat SARS coronavirus Rf1                             |
| AY508724.1            | SARS coronavirus NS-1                     | SARS coronavirus NS-1                                |
| AY485277              | SARS coronavirus Sino1-11                 | SARS coronavirus Sino1-11                            |
| AY390556              | SARS coronavirus GZ02                     | SARS coronavirus GZ02                                |
| AY278489              | SARS coronavirus GD01                     | SARS coronavirus GD01                                |
| DQ648794.1            | BtCoV/133/2005                            | Bat coronavirus V/133/2005                           |
| MH734115.1            | MERS-CoV                                  | Middle East respiratory syndrome-related coronavirus |

|                 |                                 |                                                                         |
|-----------------|---------------------------------|-------------------------------------------------------------------------|
| EF065513.1      | BtCoV HKU9-1                    | Bat coronavirus HKU9-1                                                  |
| EF065516.1      | BatCoV HKU9-4                   | Bat coronavirus HKU9-4                                                  |
| EF065515.1      | BatCoV HKU9-3                   | Bat coronavirus HKU9-3                                                  |
| EF065514.1      | BatCoV HKU9-2                   | Bat coronavirus HKU9-2                                                  |
| MG772934.1      | Bat-SL-CoVZXC21                 | Bat SARS-like coronavirus                                               |
| MG772933.1      | Bat-SL-CoVZC45                  | Bat SARS-like coronavirus                                               |
| NC_016994.1     | Night-heron CoV HKU19           | Night-heron coronavirus HKU19                                           |
| NC_016995.1     | Wigeon CoV HKU20                | Wigeon coronavirus HKU20                                                |
| NC_016996.1     | Common-moorhen CoV HKU21        | Common-moorhen coronavirus HKU21                                        |
| NC_011550.1     | Munia CoV HKU13-3514            | Munia coronavirus HKU13-3514                                            |
| NC_016991.1     | White-eye CoV HKU16             | White-eye coronavirus HKU16                                             |
| NC_011549.1     | Thrush CoV HKU12-600            | Thrush coronavirus HKU12-600                                            |
| NC_011547.1     | Bulbul CoV HKU11-934            | Bulbul coronavirus HKU11-934                                            |
| NC_010646.1     | BWCoV SW1                       | Beluga Whale coronavirus SW1                                            |
| AJ311317.1      | IBV Beaudette CK                | Avian infectious bronchitis virus Beaudette                             |
| NC_045512.2     | Wuhan-Hu-1                      | Wuhan seafood market pneumonia virus isolate Wuhan-Hu-1                 |
| MN988668.1      | 2019-nCoV WHU01                 | Wuhan seafood market pneumonia virus isolate 2019-nCoV WHU01            |
| MN988669        | 2019-nCoV WHU02                 | Wuhan seafood market pneumonia virus isolate 2019-nCoV WHU02            |
| MN988713        | 2019-nCoV/USA-IL1/2020          | Wuhan seafood market pneumonia virus isolate                            |
| MN997409        | 2019-nCoV/USA-AZ1/2020          | Wuhan seafood market pneumonia virus isolate 2019-nCoV/USA-AZ1/2020     |
| MN985325.1      | 2019-nCoV/USA-WA1/2020          | Wuhan seafood market pneumonia virus isolate 2019-nCoV/USA-WA1/2020     |
| MN975262        | 2019-nCoV_HKU-SZ-005b_2020      | Wuhan seafood market pneumonia virus isolate 2019-nCoV_HKU-SZ-005b_2020 |
| MN938384        | 2019-nCoV_HKU-SZ-002a_2020      | Wuhan seafood market pneumonia virus isolate 2019-nCoV_HKU-SZ-002a_2020 |
| NMDC60013002-05 | BetaCoVWuhanWH190022019         | Wuhan seafood market pneumonia virus BetaCoV / Wuhan / WH19002 / 2019   |
| NMDC60013002-07 | BetaCoV / Wuhan / YS8011 / 2020 | Wuhan seafood market pneumonia virus                                    |

**Table S2.** Bayesian information criterion (BIC) values for nucleotides substitution model selection.

| ID | NAME      | PARTITION | -iIL        | P   | BIC          | DELTA BIC  | WEIGHT | CUM WEIGHT | uDELTA |
|----|-----------|-----------|-------------|-----|--------------|------------|--------|------------|--------|
| 1  | JC        | 000000    | 914100.5795 | 104 | 1829325.4632 | 99383.3515 | 0.0    | 1.0        | -      |
| 2  | JC+I      | 000000    | 899077.0642 | 105 | 1799289.2432 | 69347.1316 | 0.0    | 1.0        | -      |
| 3  | JC+G      | 000000    | 888595.5907 | 105 | 1778326.2962 | 48384.1846 | 0.0    | 1.0        | -      |
| 4  | JC+I+G    | 000000    | 886292.7187 | 106 | 1773731.3627 | 43789.251  | 0.0    | 1.0        | -      |
| 5  | F81       | 000000    | 911097.9293 | 107 | 1823352.5945 | 93410.4828 | 0.0    | 1.0        | -      |
| 6  | F81+I     | 000000    | 895781.524  | 108 | 1792730.5947 | 62788.483  | 0.0    | 1.0        | -      |
| 7  | F81+G     | 000000    | 883022.6587 | 108 | 1767212.864  | 37270.7523 | 0.0    | 1.0        | -      |
| 8  | F81+I+G   | 000000    | 881099.889  | 109 | 1763378.1353 | 33436.0236 | 0.0    | 1.0        | -      |
| 9  | K80       | 010010    | 904187.4933 | 105 | 1809510.1014 | 79567.9897 | 0.0    | 1.0        | -      |
| 10 | K80+I     | 010010    | 888910.6315 | 106 | 1778967.1883 | 49025.0766 | 0.0    | 1.0        | -      |
| 11 | K80+G     | 010010    | 876796.3837 | 106 | 1754738.6927 | 24796.5811 | 0.0    | 1.0        | -      |
| 12 | K80+I+G   | 010010    | 874722.137  | 107 | 1750601.01   | 20658.8983 | 0.0    | 1.0        | -      |
| 13 | HKY       | 010010    | 898982.1874 | 108 | 1799131.9215 | 69189.8098 | 0.0    | 1.0        | -      |
| 14 | HKY+I     | 010010    | 883187.0687 | 109 | 1767552.4946 | 37610.3829 | 0.0    | 1.0        | -      |
| 15 | HKY+G     | 010010    | 867361.7698 | 109 | 1735901.8967 | 5959.7851  | 0.0    | 1.0        | -      |
| 16 | HKY+I+G   | 010010    | 865687.0489 | 110 | 1732563.2655 | 2621.1539  | 0.0    | 1.0        | -      |
| 17 | TrNef     | 010020    | 904164.502  | 106 | 1809474.9293 | 79532.8177 | 0.0    | 1.0        | -      |
| 18 | TrNef+I   | 010020    | 888890.5198 | 107 | 1778937.7755 | 48995.6638 | 0.0    | 1.0        | -      |
| 19 | TrNef+G   | 010020    | 876792.3255 | 107 | 1754741.387  | 24799.2754 | 0.0    | 1.0        | -      |
| 20 | TrNef+I+G | 010020    | 874720.6069 | 108 | 1750608.7603 | 20666.6487 | 0.0    | 1.0        | -      |

|    |            |        |             |     |              |            |     |     |   |
|----|------------|--------|-------------|-----|--------------|------------|-----|-----|---|
| 21 | TrN        | 010020 | 898753.7097 | 109 | 1798685.7766 | 68743.665  | 0.0 | 1.0 | - |
| 22 | TrN+I      | 010020 | 882984.8821 | 110 | 1767158.932  | 37216.8204 | 0.0 | 1.0 | - |
| 23 | TrN+G      | 010020 | 867342.3046 | 110 | 1735873.7771 | 5931.6655  | 0.0 | 1.0 | - |
| 24 | TrN+I+G    | 010020 | 865662.3268 | 111 | 1732524.632  | 2582.5204  | 0.0 | 1.0 | - |
| 33 | TPM2       | 010212 | 901552.7593 | 106 | 1804251.4439 | 74309.3323 | 0.0 | 1.0 | - |
| 34 | TPM2+I     | 010212 | 886422.3629 | 107 | 1774001.4618 | 44059.3501 | 0.0 | 1.0 | - |
| 35 | TPM2+G     | 010212 | 874274.2676 | 107 | 1749705.2712 | 19763.1596 | 0.0 | 1.0 | - |
| 36 | TPM2+I+G   | 010212 | 872235.5535 | 108 | 1745638.6537 | 15696.542  | 0.0 | 1.0 | - |
| 37 | TPM2uf     | 010212 | 897935.8956 | 109 | 1797050.1483 | 67108.0367 | 0.0 | 1.0 | - |
| 38 | TPM2uf+I   | 010212 | 882320.5431 | 110 | 1765830.254  | 35888.1424 | 0.0 | 1.0 | - |
| 39 | TPM2uf+G   | 010212 | 866771.3515 | 110 | 1734731.8708 | 4789.7592  | 0.0 | 1.0 | - |
| 40 | TPM2uf+I+G | 010212 | 865089.2863 | 111 | 1731378.5509 | 1436.4393  | 0.0 | 1.0 | - |
| 57 | TIM2ef     | 010232 | 901535.9953 | 107 | 1804228.7267 | 74286.615  | 0.0 | 1.0 | - |
| 58 | TIM2ef+I   | 010232 | 886407.6797 | 108 | 1773982.906  | 44040.7943 | 0.0 | 1.0 | - |
| 59 | TIM2ef+G   | 010232 | 874277.0652 | 108 | 1749721.677  | 19779.5653 | 0.0 | 1.0 | - |
| 60 | TIM2ef+I+G | 010232 | 872235.2887 | 109 | 1745648.9347 | 15706.8231 | 0.0 | 1.0 | - |
| 61 | TIM2       | 010232 | 897707.2895 | 110 | 1796603.7469 | 66661.6352 | 0.0 | 1.0 | - |
| 62 | TIM2+I     | 010232 | 882119.0099 | 111 | 1765437.9965 | 35495.8849 | 0.0 | 1.0 | - |
| 63 | TIM2+G     | 010232 | 866738.831  | 111 | 1734677.6405 | 4735.5289  | 0.0 | 1.0 | - |
| 64 | TIM2+I+G   | 010232 | 865052.3642 | 112 | 1731315.5175 | 1373.4059  | 0.0 | 1.0 | - |
| 41 | TPM3       | 012012 | 903440.6626 | 106 | 1808027.2505 | 78085.1388 | 0.0 | 1.0 | - |
| 42 | TPM3+I     | 012012 | 888161.5517 | 107 | 177479.8395  | 47537.7278 | 0.0 | 1.0 | - |
| 43 | TPM3+G     | 012012 | 876546.5123 | 107 | 1754249.7605 | 24307.6489 | 0.0 | 1.0 | - |
| 44 | TPM3+I+G   | 012012 | 874426.1422 | 108 | 1750019.831  | 20077.7193 | 0.0 | 1.0 | - |
| 45 | TPM3uf     | 012012 | 899047.6978 | 109 | 1799273.7528 | 69331.6412 | 0.0 | 1.0 | - |
| 46 | TPM3uf+I   | 012012 | 883246.9078 | 110 | 1767682.9834 | 37740.8718 | 0.0 | 1.0 | - |
| 47 | TPM3uf+G   | 012012 | 866551.9145 | 110 | 1734292.9968 | 4350.8851  | 0.0 | 1.0 | - |
| 48 | TPM3uf+I+G | 012012 | 865016.611  | 111 | 1731233.2003 | 1291.0887  | 0.0 | 1.0 | - |
| 65 | TIM3ef     | 012032 | 903472.0542 | 107 | 1808100.8443 | 78158.7327 | 0.0 | 1.0 | - |
| 66 | TIM3ef+I   | 012032 | 888147.807  | 108 | 1777463.1605 | 47521.0489 | 0.0 | 1.0 | - |
| 67 | TIM3ef+G   | 012032 | 876546.7924 | 108 | 1754261.1313 | 24319.0197 | 0.0 | 1.0 | - |
| 68 | TIM3ef+I+G | 012032 | 874423.1419 | 109 | 1750024.6411 | 20082.5294 | 0.0 | 1.0 | - |
| 69 | TIM3       | 012032 | 898812.7423 | 110 | 1798814.6524 | 68872.5408 | 0.0 | 1.0 | - |
| 70 | TIM3+I     | 012032 | 883045.0929 | 111 | 1767290.1643 | 37348.0527 | 0.0 | 1.0 | - |
| 71 | TIM3+G     | 012032 | 866501.6048 | 111 | 1734203.1881 | 4261.0765  | 0.0 | 1.0 | - |
| 72 | TIM3+I+G   | 012032 | 864966.0137 | 112 | 1731142.8165 | 1200.7049  | 0.0 | 1.0 | - |
| 25 | TPM1       | 012210 | 903618.7681 | 106 | 1808383.4615 | 78441.3498 | 0.0 | 1.0 | - |
| 26 | TPM1+I     | 012210 | 888253.1842 | 107 | 1777663.1044 | 47720.9927 | 0.0 | 1.0 | - |
| 27 | TPM1+G     | 012210 | 876361.5225 | 107 | 1753879.781  | 23937.6694 | 0.0 | 1.0 | - |
| 28 | TPM1+I+G   | 012210 | 874243.2697 | 108 | 1749654.0859 | 19711.9743 | 0.0 | 1.0 | - |
| 29 | TPM1uf     | 012210 | 898952.3011 | 109 | 1799082.9595 | 69140.8478 | 0.0 | 1.0 | - |
| 30 | TPM1uf+I   | 012210 | 883158.0742 | 110 | 1767505.3162 | 37563.2046 | 0.0 | 1.0 | - |
| 31 | TPM1uf+G   | 012210 | 867361.3015 | 110 | 1735911.7708 | 5969.6592  | 0.0 | 1.0 | - |
| 32 | TPM1uf+I+G | 012210 | 865683.9287 | 111 | 1732567.8359 | 2625.7243  | 0.0 | 1.0 | - |
| 49 | TIM1ef     | 012230 | 903595.3084 | 107 | 1808347.3528 | 78405.2411 | 0.0 | 1.0 | - |
| 50 | TIM1ef+I   | 012230 | 888232.8571 | 108 | 1777633.2608 | 47691.1491 | 0.0 | 1.0 | - |
| 51 | TIM1ef+G   | 012230 | 876356.3963 | 108 | 1753880.3391 | 23938.2275 | 0.0 | 1.0 | - |
| 52 | TIM1ef+I+G | 012230 | 874243.8793 | 109 | 1749666.1159 | 19724.0043 | 0.0 | 1.0 | - |
| 53 | TIM1       | 012230 | 898723.3885 | 110 | 1798635.9448 | 68693.8332 | 0.0 | 1.0 | - |
| 54 | TIM1+I     | 012230 | 882957.176  | 111 | 1767114.3303 | 37172.2187 | 0.0 | 1.0 | - |
| 55 | TIM1+G     | 012230 | 867341.2268 | 111 | 1735882.4321 | 5940.3205  | 0.0 | 1.0 | - |
| 56 | TIM1+I+G   | 012230 | 865658.9064 | 112 | 1732528.6019 | 2586.4903  | 0.0 | 1.0 | - |
| 73 | TVMef      | 012314 | 900683.8853 | 108 | 1802535.3173 | 72593.2056 | 0.0 | 1.0 | - |
| 74 | TVMef+I    | 012314 | 885552.4015 | 109 | 1772283.1602 | 42341.0485 | 0.0 | 1.0 | - |
| 75 | TVMef+G    | 012314 | 873957.4473 | 109 | 1749093.2518 | 19151.1402 | 0.0 | 1.0 | - |
| 76 | TVMef+I+G  | 012314 | 871860.5101 | 110 | 1744910.188  | 14968.0764 | 0.0 | 1.0 | - |
| 77 | TVM        | 012314 | 897934.6949 | 111 | 1797069.3683 | 67127.2567 | 0.0 | 1.0 | - |
| 78 | TVM+I      | 012314 | 882318.388  | 112 | 1765847.5649 | 35905.4533 | 0.0 | 1.0 | - |
| 79 | TVM+G      | 012314 | 865961.8492 | 112 | 1733134.4873 | 3192.3757  | 0.0 | 1.0 | - |
| 80 | TVM+I+G    | 012314 | 864420.9661 | 113 | 1730063.5319 | 121.4203   | 0.0 | 1.0 | - |
| 81 | SYM        | 012345 | 900706.0847 | 109 | 1802590.5266 | 72648.415  | 0.0 | 1.0 | - |
| 82 | SYM+I      | 012345 | 885546.4423 | 110 | 1772282.0524 | 42339.9408 | 0.0 | 1.0 | - |
| 83 | SYM+G      | 012345 | 873956.7992 | 110 | 1749102.7662 | 19160.6546 | 0.0 | 1.0 | - |
| 84 | SYM+I+G    | 012345 | 871860.2261 | 111 | 1744920.4307 | 14978.3191 | 0.0 | 1.0 | - |
| 85 | GTR        | 012345 | 897658.6512 | 112 | 1796528.0914 | 66585.9798 | 0.0 | 1.0 | - |
| 86 | GTR+I      | 012345 | 882074.5856 | 113 | 1765370.7709 | 35428.6593 | 0.0 | 1.0 | - |
| 87 | GTR+G      | 012345 | 865904.1275 | 113 | 1733029.8546 | 3087.7429  | 0.0 | 1.0 | - |
| 88 | GTR+I+G    | 012345 | 864354.8507 | 114 | 1729942.1116 | 0.0        | 1.0 | 1.0 | - |

1            10            20            30            40            50            60            70            8082  
 |-----|-----|-----|-----|-----|-----|-----|-----|-----|-----|  
 Wuhan-Hu-1    **MYSFVSEETGTLIVNSVLLFLAFVYVLLVTLAILTALRLCAYCCNIYNSLVKPSFYVYSRVKNL--NSSR-VPDLLV**  
 SARS\_CoV    **MYSFVSEETGTLIVNSVLLFLAFVYVLLVTLAILTALRLCAYCCNIYNSLVKPTVYVYSRVKNL--NSSEGVPDLLV**  
 MERS        **MLPFVQERIGLFIYNFFIFTVYCAITLLVCHAFLTATRLCVCMTGFNTLLVQPALYLNTGRSYYVKFQDSKPLPPDEHW**  
 Consensus    **MysFVsEetGtIIVNsvllflafvlllvtlailtalrlcaycCnIyvNsvLvkP..YvYsrvknL..nss..vPdLlv....**

**Figure S1.** Envelop (E) protein multialign sequence comparison of Wuhan-Hu-1-CoV (Wuhan seafood market pneumonia virus), SARS-CoV (GZ02) and MERS CoV.

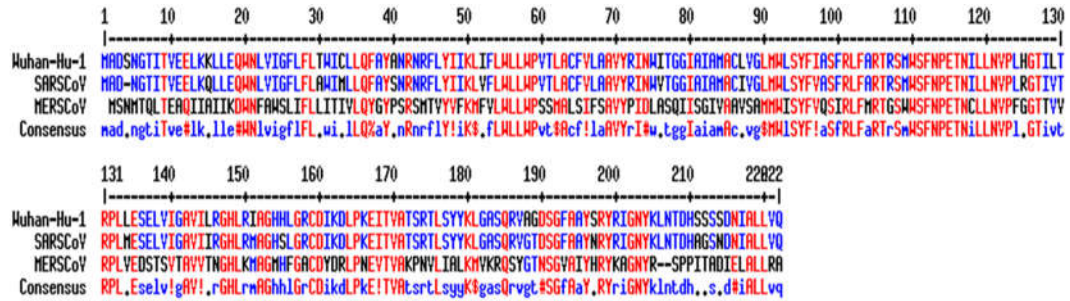

**Figure S2.** Membrane (M) protein multialign sequence comparison of Wuhan-Hu-1-CoV (Wuhan seafood market pneumonia virus), SARS-CoV (GZ02) and MERS CoV.

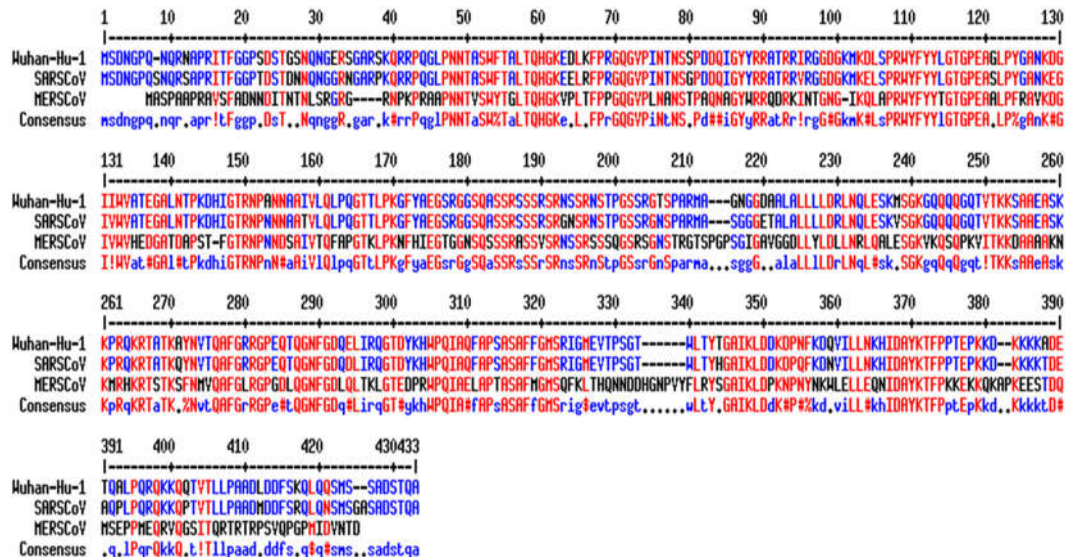

**Figure S3.** Nucleocapsid (N) protein multialign sequence comparison of Wuhan-Hu-1-CoV (Wuhan seafood market pneumonia virus), SARS-CoV (GZ02) and MERS CoV.



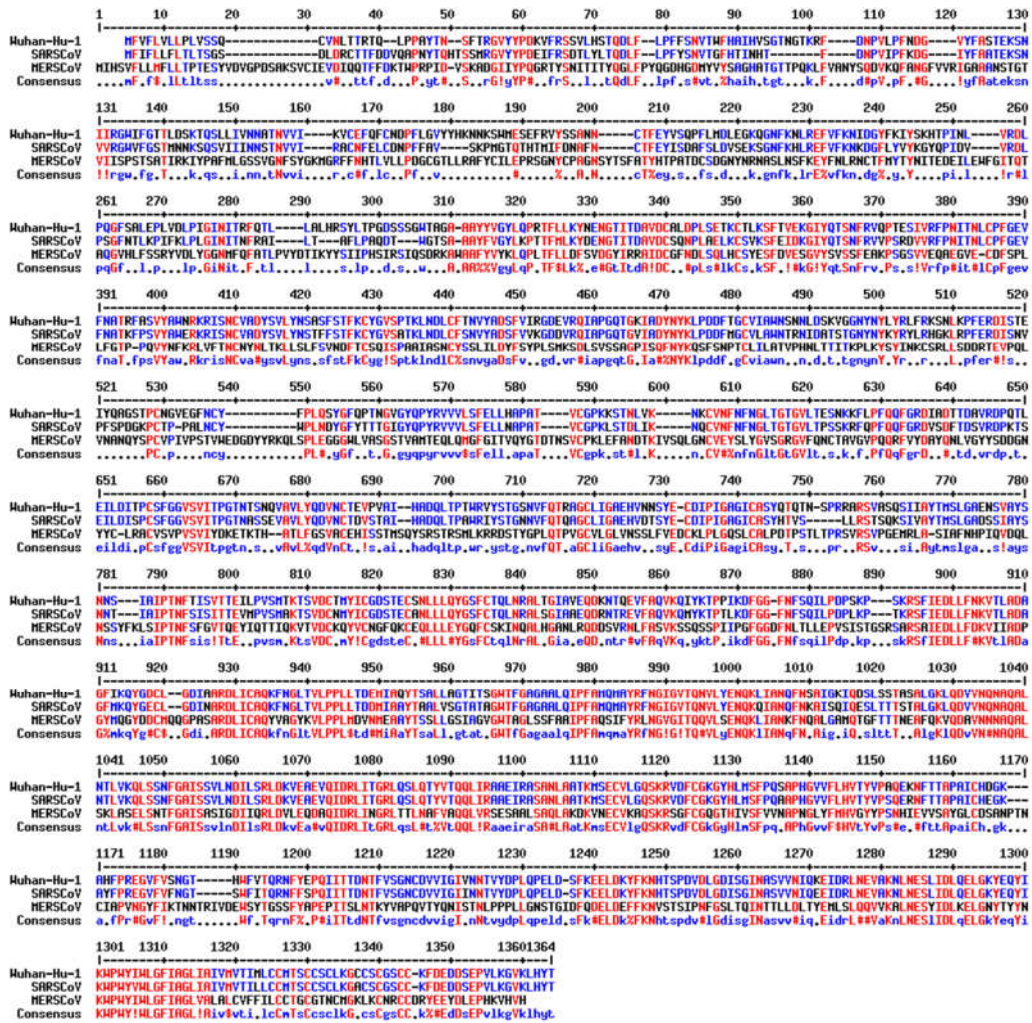

Figure S4. Spike (S) protein multialign sequence comparison of Wuhan-Hu-1-CoV (Wuhan seafood market pneumonia virus), SARS-CoV (GZ02) and MERS CoV.

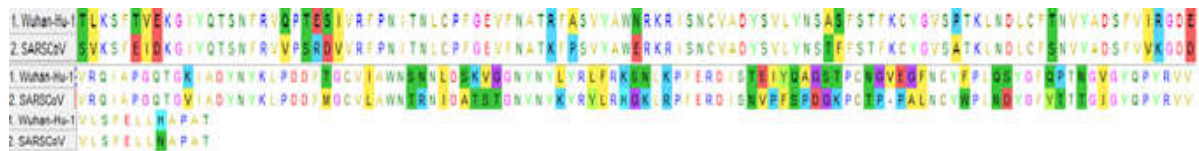

Figure S5. Receptor binding domain (306-527) comparison between Wuhan-Hu-1 (Wuhan seafood market pneumonia virus), SARS-CoV (GZ02).

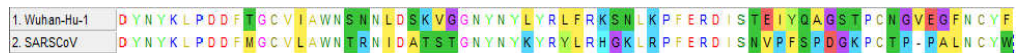

Figure S6. Receptor binding motif receptor binding to human ACE2 (424-494); Comparison between Wuhan-Hu-1-CoV (Wuhan seafood market pneumonia virus), SARS-CoV (GZ02).

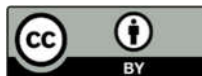

Supplement: pathogens-09-00240-s001.pdf [file pathogens-09-00240-s001.pdf]
